# Supplementary material
Source: PubMed Central journal article supplement (PMC3571344)
Supplement: MCB.01198-12_zmb999109851so5.pdf [file MCB.01198-12_zmb999109851so5.pdf]

Supplemental Table 5: Summary of Chromosomal Mappable Sites and CENP-A enrichment

| chr     | Mappability            |                              |           | CENP-A                 |                              |           |
|---------|------------------------|------------------------------|-----------|------------------------|------------------------------|-----------|
|         | HOR<br>(incl 2,3 mers) | non-HOR homogenized monomers | Monomeric | HOR<br>(incl 2,3 mers) | non-HOR homogenized monomers | Monomeric |
| chr1    | 59550                  | 167                          | 10294     | 23                     | 0                            | 0         |
| chr2    | 28539                  | 14273                        | 13569     | 922                    | 29                           | 0         |
| chr3    | 4793                   | 4858                         | 147366    | 0                      | 0                            | 12        |
| chr4    | 19720                  | 27                           | 29200     | 0                      | 0                            | 0         |
| chr5    | 21897                  | 4053                         | 394087    | 0                      | 0                            | 2         |
| chr6    | 4237                   | 39413                        | 74697     | 300                    | 0                            | 5         |
| chr7    | 93113                  | 40227                        | 443411    | 145                    | 0                            | 6         |
| chr8    | 13973                  | 37980                        | 456463    | 483                    | 0                            | 0         |
| chr9    | 5487                   | 159914                       | 12108     | 0                      | 8                            | 0         |
| chr10   | 8649                   | 4275                         | 81775     | 18                     | 0                            | 0         |
| chr11   | 17159                  | 186724                       | 629197    | 22                     | 0                            | 9         |
| chr12   | 3805                   | 23241                        | 466730    | 0                      | 0                            | 1         |
| chr13   | 0                      | 0                            | 472       | 0                      | 0                            | 0         |
| chr14   | 124                    | 31874                        | 9944      | 0                      | 0                            | 0         |
| chr15   | 3578                   | 13456                        | 9928      | 0                      | 0                            | 0         |
| chr16   | 3189                   | 43406                        | 244728    | 0                      | 0                            | 0         |
| chr17   | 11026                  | 7958                         | 82595     | 3                      | 0                            | 0         |
| chr18   | 2130                   | 14129                        | 5137      | 0                      | 0                            | 12        |
| chr19   | 23136                  | 8461                         | 422103    | 6                      | 1                            | 4         |
| chr20   | 1308                   | 27061                        | 31343     | 0                      | 0                            | 0         |
| chr21   | 131                    | 18249                        | 49616     | 0                      | 0                            | 2         |
| chr22   | 0                      | 302                          | 4467      | 0                      | 0                            | 0         |
| chrX    | 28822                  | 18524                        | 318469    | 8395                   | 143                          | 481       |
| chrY    | 37280                  | 58051                        | 28243     | 35129                  | 21                           | 76        |
| Summary | 391646                 | 756623                       | 3965942   | 45446                  | 202                          | 610       |
