# Supplementary material
Source: PubMed Central journal article supplement (PMC3571344)
Supplement: MCB.01198-12_zmb999109851so6.pdf [file MCB.01198-12_zmb999109851so6.pdf]

Supplemental Table 6: CENP-A enrichment summary within assembled higher order repeat sequences

| chr   | HOR_ID    | Mappable Sites | CENP-A Enriched Sites | % Sites Enriched |
|-------|-----------|----------------|-----------------------|------------------|
| chr1  | D1Z7      | 991            | 14                    | 1.4              |
| chr1  | D1Z5      | 58559          | 9                     | < 1.0            |
| chr2  | novel-2   | 202            | 0                     | 0                |
| chr2  | D2Z1      | 27341          | 922                   | 3.4              |
| chr3  | novel-3   | 495            | 0                     | 0                |
| chr4  | novel-4   | 18547          | 0                     | 0                |
| chr5  | novel-5   | 1448           | 0                     | 0                |
| chr5  | pG_A16    | 17614          | 0                     | 0                |
| chr6  | D6Z1      | 1916           | 300                   | 15.7             |
| chr6  | novel-6   | 1659           | 0                     | 0                |
| chr7  | novel-7a  | 2246           | 0                     | 0                |
| chr7  | D7Z1      | 2562           | 145                   | 5.7              |
| chr7  | novel-7b  | 4215           | 0                     | 0                |
| chr7  | D7Z2      | 81455          | 0                     | 0                |
| chr8  | novel-8   | 1805           | 0                     | 0                |
| chr8  | D8Z2      | 11494          | 483                   | 4.2              |
| chr10 | D10Z1     | 8509           | 18                    | < 1.0            |
| chr11 | novel-11  | 8238           | 22                    | < 1.0            |
| chr15 | novel-15a | 402            | 0                     | 0                |
| chr15 | novel-15b | 1553           | 0                     | 0                |
| chr17 | D17Z1B    | 9683           | 3                     | 0                |
| chr19 | novel-19a | 218            | 0                     | 0                |
| chr19 | novel-19b | 1472           | 0                     | 0                |
| chr19 | pG_A16    | 15354          | 0                     | 0                |
| chrX  | novel-X   | 2265           | 0                     | 0                |
| chrX  | DXZ1      | 22761          | 8395                  | 36.9             |
| chrY  | DYZ3      | 37280          | 35129                 | 94.2             |
