# Supplementary material
Source: PubMed Central journal article supplement (PMC3571344)
Supplement: MCB.01198-12_zmb999109851so7.pdf [file MCB.01198-12_zmb999109851so7.pdf]

**Supplemental Table 7: Monomeric, Low-coverage/Single-copy sites of CENP-A enrichment**

| UID | chr | chrS     | chrE     | Overlapping 50mers |
|-----|-----|----------|----------|--------------------|
| 1   | 3   | 90454978 | 90454990 | 12                 |
| 2   | 5   | 46391684 | 46391685 | 1                  |
| 3   | 6   | 61905219 | 61905220 | 1                  |
| 4   | 6   | 61910884 | 61910886 | 2                  |
| 5   | 7   | 58008621 | 58008628 | 7                  |
| 6   | 11  | 48883521 | 48883522 | 1                  |
| 7   | 11  | 50743318 | 50743319 | 1                  |
| 8   | 19  | 27734607 | 27734611 | 4                  |
| 9   | 19  | 27737625 | 27737627 | 2                  |
| 10  | 21  | 14359518 | 14359519 | 1                  |
| 11  | X   | 58562306 | 58562329 | 23                 |
| 12  | X   | 58561579 | 58561593 | 14                 |
| 13  | X   | 58561527 | 58561529 | 2                  |
| 14  | X   | 58561465 | 58561472 | 7                  |
| 15  | X   | 58561431 | 58561440 | 9                  |
| 16  | X   | 58561397 | 58561398 | 1                  |
| 17  | X   | 58561286 | 58561310 | 24                 |
| 18  | X   | 58561279 | 58561280 | 1                  |
| 19  | X   | 58561242 | 58561276 | 34                 |
| 20  | X   | 58559593 | 58559611 | 18                 |
| 21  | X   | 58559246 | 58559271 | 25                 |
| 22  | X   | 58559069 | 58559091 | 22                 |
| 23  | X   | 58558966 | 58558988 | 22                 |
| 24  | X   | 58558803 | 58558809 | 6                  |
| 25  | X   | 58558738 | 58558753 | 15                 |
| 26  | X   | 58557743 | 58557774 | 31                 |
| 27  | X   | 58557585 | 58557594 | 9                  |
| 28  | X   | 58557263 | 58557264 | 1                  |
| 29  | X   | 58556838 | 58556839 | 1                  |
| 30  | X   | 58556823 | 58556827 | 4                  |
| 31  | X   | 58556739 | 58556741 | 2                  |
| 32  | X   | 58556673 | 58556686 | 13                 |
| 33  | X   | 58556559 | 58556562 | 3                  |
| 34  | X   | 58556541 | 58556547 | 6                  |
